# Supplementary material
Source: publisher site journal article supplement (https://www.dovepress.com/article/512471)

**Supplementary Figure 1**, Path diagram of regression coefficients.

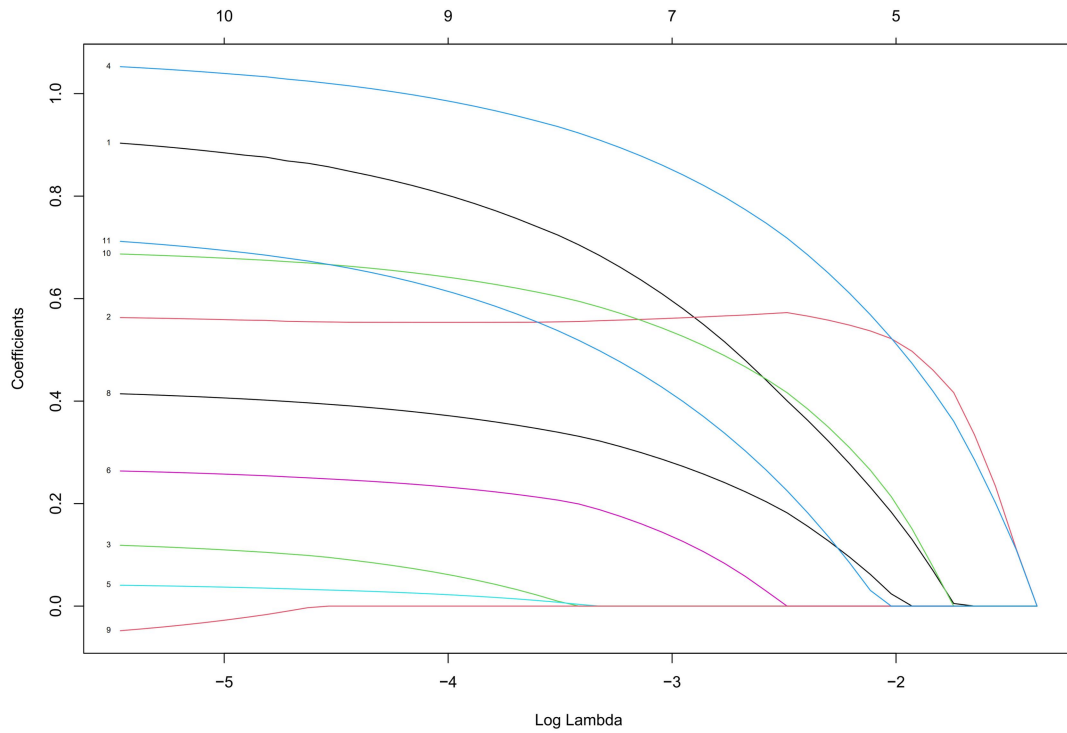

**Supplementary Figure 2**, Cross-validation curves from LASSO regression.

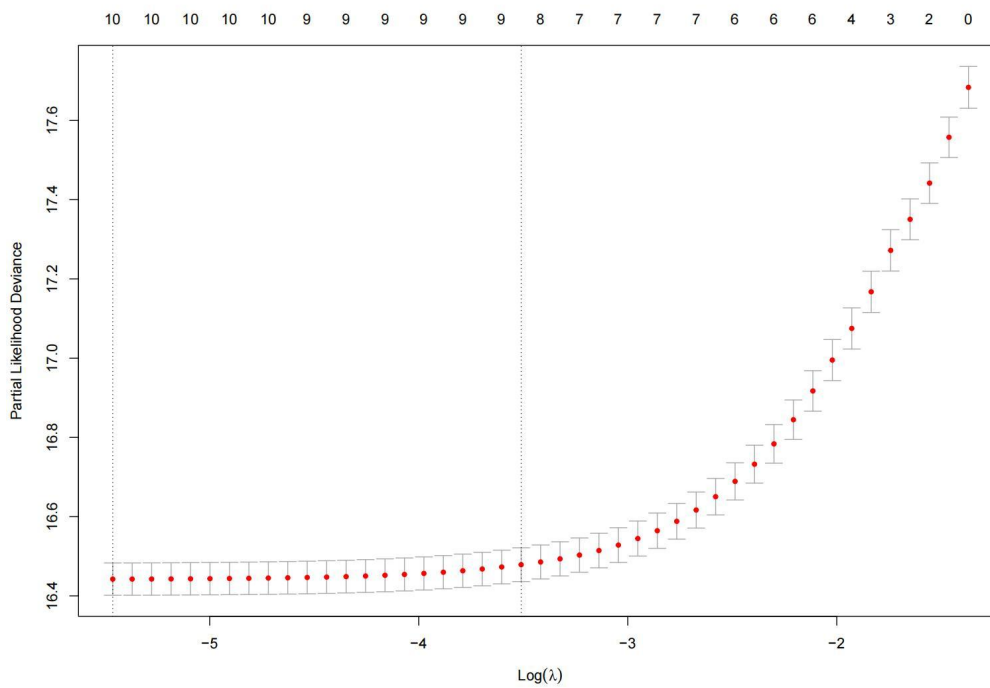

### Supplementary Figure 3, Calibration curves of the nomogram for predicting HCC occurrence.

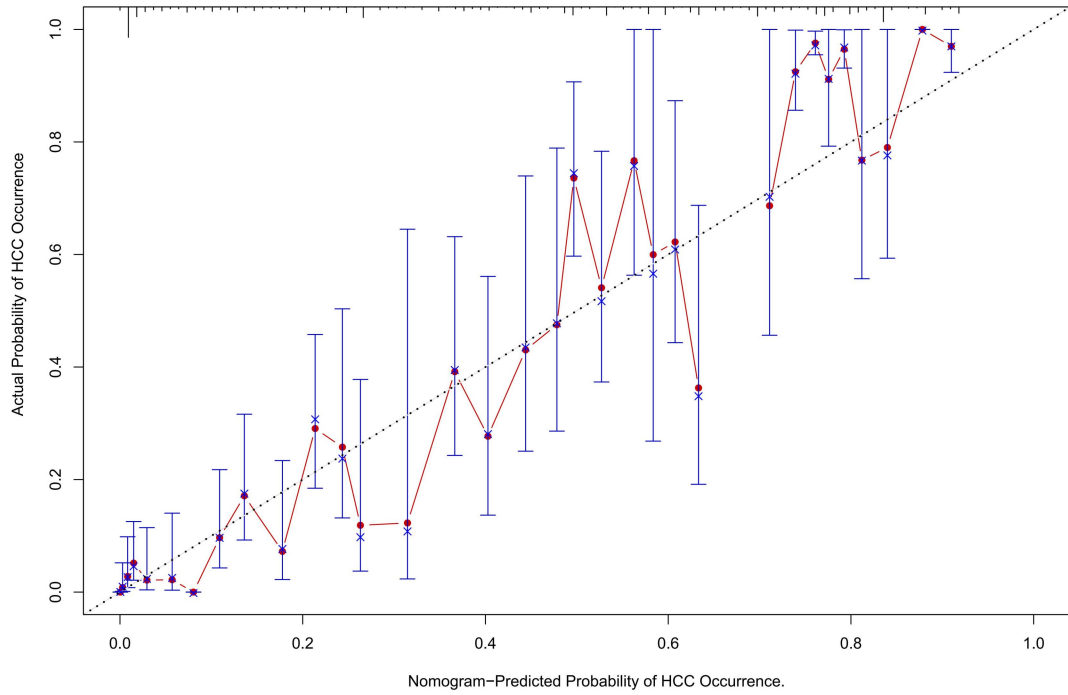

Supplement: Supplementary file 1 [file 512471-Supplementary-Material.pdf]
